# Supplementary material for: Stable white electroluminescence from single fluorene-based copolymers: using fluorenone as the green fluorophore and an iridium complex as the red phosphor on the main chain
Source: Royal Society of Chemistry journal article supplement (doi:10.1039/b714317f), 2007-11-19
Supplement: b714317f.pdf [file b714317f.pdf]

# **Stable White Electroluminescence from Single Fluorene-based Copolymer: Using Fluorenone as the Green Fluorophore and Iridium Complex as the Red Phosphor on the Main Chain**

**Kai Zhang,<sup>a</sup> Zhao Chen,<sup>b</sup> Chuluo Yang,<sup>a\*</sup> Youtian Tao,<sup>a</sup> Yang Zou,<sup>a</sup> Jingui Qin,<sup>a\*</sup> and Yong Cao<sup>b</sup>**

*<sup>a</sup> Department of Chemistry, Hubei Key Lab on Organic and Polymeric Optoelectronic Materials, Wuhan University, Wuhan 430072, People's Republic of China*

*Email: clyang@whu.edu.cn*

*<sup>b</sup> Institute of Polymer Optoelectronic Materials and Devices, South China University of Technology, Guangzhou 510640, People's Republic of China*

**Table S1. Structural and thermal properties of copolymers**

| copolymers | Feed ratio of <b>M2:M1:M3:M4</b> | $M_n$ | PDI  | $T_d$ (°C) |
|------------|----------------------------------|-------|------|------------|
| <b>PFH</b> | 50:50:0:0                        |       |      |            |
| <b>P1</b>  | 50:49.4:0.2:0.4                  | 21510 | 2.55 | 414        |
| <b>P2</b>  | 50:49.7:0.1:0.2                  | 17220 | 2.54 | 423        |
| <b>P3</b>  | 50:49.85:0.05:0.1                | 16500 | 2.80 | 422        |
| <b>P4</b>  | 50:49.97:0.01:0.02               | 6171  | 1.96 | 423        |
| <b>P5</b>  | 50:49.98:0.005:0.015             | 5350  | 1.79 | 396        |
| <b>P6</b>  | 50:49.985:0.005:0.01             | 8401  | 2.09 | 409        |

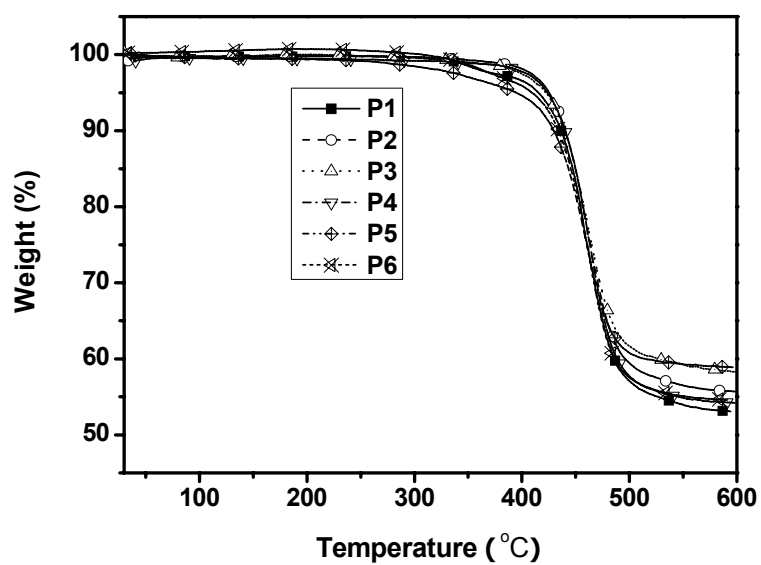

**Figure S1.** TGA thermograms of copolymers **P1-6**.

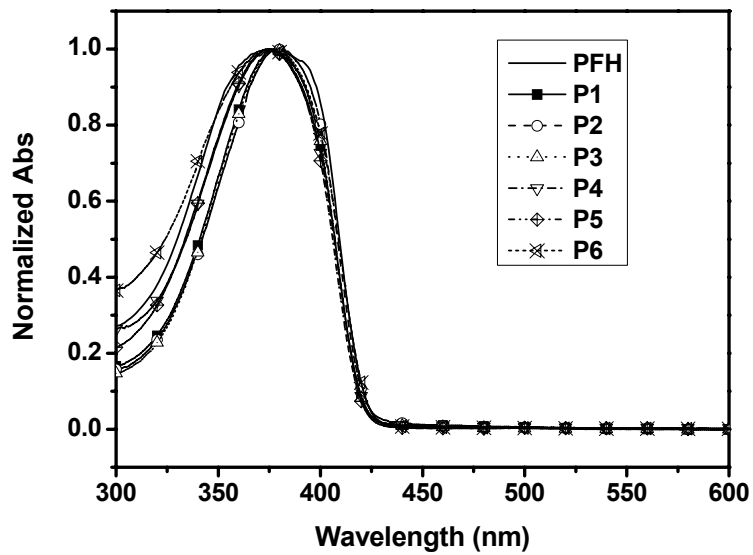

Figure S2. Absorption spectra of PFH and P1-6 in film.

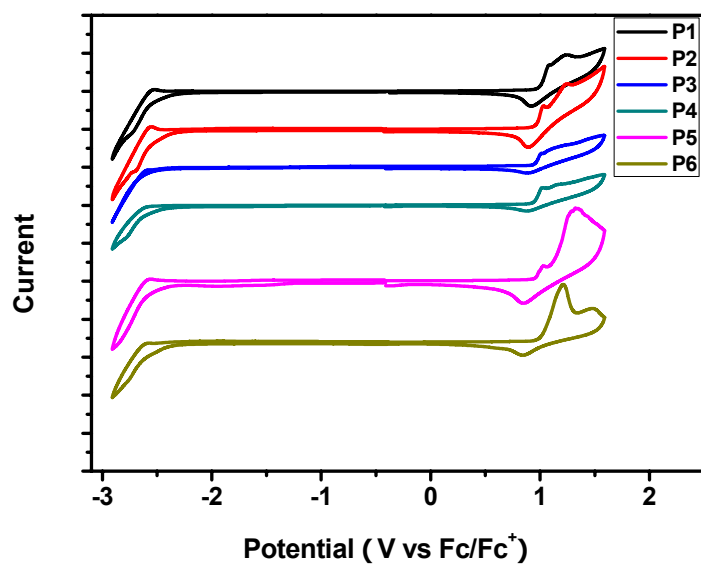

**Figure S3.** Cyclic voltammograms of **P1-6**.

**Table S2. Electrochemistry properties of copolymers**

| copolymers | $E_{\text{ox}}^{\text{onset}}$<br>V <sup>[a]</sup> | HOMO<br>eV | $E_{\text{red}}^{\text{onset}}$<br>V <sup>[a]</sup> | LUMO<br>eV |
|------------|----------------------------------------------------|------------|-----------------------------------------------------|------------|
| <b>PFH</b> | 0.98                                               | -5.78      | -2.53                                               | -2.27      |
| <b>P1</b>  | 1.00                                               | 5.80       | -2.50                                               | -2.30      |
| <b>P2</b>  | 0.99                                               | -5.79      | -2.50                                               | -2.30      |
| <b>P3</b>  | 0.97                                               | -5.77      | -2.54                                               | -2.26      |
| <b>P4</b>  | 0.97                                               | -5.77      | -2.52                                               | -2.28      |
| <b>P5</b>  | 0.97                                               | -5.77      | -2.52                                               | -2.28      |
| <b>P6</b>  | 0.98                                               | -5.78      | -2.51                                               | -2.29      |

<sup>a</sup> *versus* Fc/ Fc<sup>+</sup>.
